# Supplementary material for: Validation of Stroke and Thrombolytic Therapy in Korean National Health Insurance Claim Data
Source: PubMed Central journal article supplement — J Clin Neurol. 2015 Sep 11;12(1):42–8. doi: 10.3988/jcn.2016.12.1.42 (PMC4712285; doi:10.3988/jcn.2016.12.1.42), 2015-09-11
Supplement: jcn-12-42-s001.pdf [file jcn-12-42-s001.pdf]

**Supplementary Table 1.** Validity of stroke codes using all diagnoses (algorithm 1) according to discharge department

|                               | <b>Sensitivity, % (95% CI)</b> | <b>Specificity, % (95% CI)</b> | <b>PPV, % (95% CI)</b> |
|-------------------------------|--------------------------------|--------------------------------|------------------------|
| Neurology ( <i>n</i> =764)    |                                |                                |                        |
| IS ( <i>n</i> =638)           | 99 (98–100)                    | 46 (38–55)                     | 90 (88–92)             |
| ICH ( <i>n</i> =13)           | 77 (50–92)                     | 100 (99–100)                   | 77 (50–92)             |
| SAH ( <i>n</i> =1)            | 100 (21–100)                   | 100 (99–100)                   | 25 (5–70)              |
| Neurosurgery ( <i>n</i> =539) |                                |                                |                        |
| IS ( <i>n</i> =46)            | 96 (85–99)                     | 96 (93–97)                     | 67 (55–77)             |
| ICH ( <i>n</i> =194)          | 98 (95–99)                     | 94 (91–96)                     | 90 (86–94)             |
| SAH ( <i>n</i> =95)           | 94 (87–97)                     | 97 (95–98)                     | 88 (80–93)             |
| Rehab. ( <i>n</i> =317)       |                                |                                |                        |
| IS ( <i>n</i> =191)           | 98 (95–99)                     | 75 (67–82)                     | 86 (81–90)             |
| ICH ( <i>n</i> =48)           | 96 (86–99)                     | 93 (89–95)                     | 70 (58–79)             |
| SAH ( <i>n</i> =16)           | 94 (72–99)                     | 99 (97–99)                     | 79 (57–91)             |
| Etc. ( <i>n</i> =191)         |                                |                                |                        |
| IS ( <i>n</i> =93)            | 73 (63–81)                     | 51 (41–61)                     | 59 (50–67)             |
| ICH ( <i>n</i> =16)           | 81 (57–93)                     | 98 (94–99)                     | 76 (53–90)             |
| SAH ( <i>n</i> =1)            | 100 (21–100)                   | 98 (95–99)                     | 25 (5–70)              |

CI: confidence interval, Etc.: et cetera, ICH: intracranial hemorrhage, IS: ischemic stroke, PPV: positive predictive value, Rehab.: rehabilitation medicine, SAH: subarachnoid hemorrhage.
