# Supplementary material for: Validation of Stroke and Thrombolytic Therapy in Korean National Health Insurance Claim Data
Source: PubMed Central journal article supplement — J Clin Neurol. 2015 Sep 11;12(1):42–8. doi: 10.3988/jcn.2016.12.1.42 (PMC4712285; doi:10.3988/jcn.2016.12.1.42), 2015-09-11
Supplement: jcn-12-42-s002.pdf [file jcn-12-42-s002.pdf]

**Supplementary Table 2.** Validity of stroke codes using one principal and one secondary diagnosis (algorithm 2) according to discharge department

|                      | <b>Sensitivity, % (95% CI)</b> | <b>Specificity, % (95% CI)</b> | <b>PPV, % (95% CI)</b> |
|----------------------|--------------------------------|--------------------------------|------------------------|
| Neurology (n=764)    |                                |                                |                        |
| IS (n=638)           | 98 (96–99)                     | 52 (43–60)                     | 91 (89–93)             |
| ICH (n=13)           | 62 (36–82)                     | 100 (99–100)                   | 73 (43–90)             |
| SAH (n=1)            | 100 (21–100)                   | 100 (99–100)                   | 25 (5–70)              |
| Neurosurgery (n=539) |                                |                                |                        |
| IS (n=46)            | 80 (67–89)                     | 96 (94–98)                     | 67 (54–78)             |
| ICH (n=194)          | 97 (93–99)                     | 95 (92–97)                     | 91 (87–94)             |
| SAH (n=95)           | 94 (87–97)                     | 98 (96–99)                     | 89 (81–94)             |
| Rehab. (n=317)       |                                |                                |                        |
| IS (n=191)           | 88 (83–92)                     | 80 (72–86)                     | 87 (82–91)             |
| ICH (n=48)           | 58 (44–71)                     | 97 (94–98)                     | 78 (62–88)             |
| SAH (n=16)           | 81 (57–93)                     | 99 (98–100)                    | 87 (62–96)             |
| Etc. (n=191)         |                                |                                |                        |
| IS (n=93)            | 39 (29–49)                     | 78 (68–85)                     | 62 (49–73)             |
| ICH (n=16)           | 25 (10–50)                     | 99 (97–100)                    | 80 (38–96)             |
| SAH (n=1)            | 100 (21–100)                   | 99 (96–100)                    | 33 (6–79)              |

CI: confidence interval, Etc.: et cetera, ICH: intracranial hemorrhage, IS: ischemic stroke, PPV: positive predictive value, Rehab.: rehabilitation medicine, SAH: subarachnoid hemorrhage.
