# Supplementary material for: Validation of Stroke and Thrombolytic Therapy in Korean National Health Insurance Claim Data
Source: PubMed Central journal article supplement — J Clin Neurol. 2015 Sep 11;12(1):42–8. doi: 10.3988/jcn.2016.12.1.42 (PMC4712285; doi:10.3988/jcn.2016.12.1.42), 2015-09-11
Supplement: jcn-12-42-s005.pdf [file jcn-12-42-s005.pdf]

**Supplementary Table 5.** Sensitivity, specificity, PPV and  $\kappa$  for ischemic stroke diagnosis for patients with in-hospital stroke

| <b>Ischemic stroke (n=67)</b> |                                |                                |                        |                                     |
|-------------------------------|--------------------------------|--------------------------------|------------------------|-------------------------------------|
|                               | <b>Sensitivity, % (95% CI)</b> | <b>Specificity, % (95% CI)</b> | <b>PPV, % (95% CI)</b> | <b><math>\kappa</math> (95% CI)</b> |
| Algorithm 1                   | 79 (67–88)                     | 88 (47–100)                    | 98 (90–100)            | 0.39 (0.16–0.62)                    |
| Algorithm 2                   | 51 (38–63)                     | 88 (47–100)                    | 97 (85–100)            | 0.14 (0.01–0.27)                    |
| Algorithm 3                   | 39 (27–52)                     | 100 (63–100)                   | 100 (87–100)           | 0.12 (0.03–0.21)                    |

CI: confidence interval, PPV: positive predictive value.
